# Supplementary material
Source: Springer Nature journal article supplement (https://www.springermedizin.de/resource/supplementary/12888_2012_1222_MOESM1_ESM.pdf/9480630)
Supplement: MOESM1 [file 9480630]

**Acute Phase ( $N=392$ )**

Open-Label Sertraline and Olanzapine  
(up to 12 weeks)

50% Meet

Remission/Near-Remission Criteria

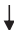

**Stabilization Phase ( $N=196$ )**

Open-Label Sertraline and Olanzapine  
(8 weeks)

10% Relapse  
or Withdraw

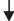

**Discontinuation RCT ( $N=176$ )**

Open-Label Sertraline plus Blinded Study Medication  
(Olanzapine or Placebo)  
(36 weeks)
